# Supplementary material
Source: HighWire-hosted journal article supplement (http://www.cmaj.ca/highwire/filestream/60006/field_highwire_adjunct_files/0/160644-image-1-at.pdf)

**Appendix 1: Erythematous linear papules on forehead of a 37-year-old man with shiitake dermatitis.**

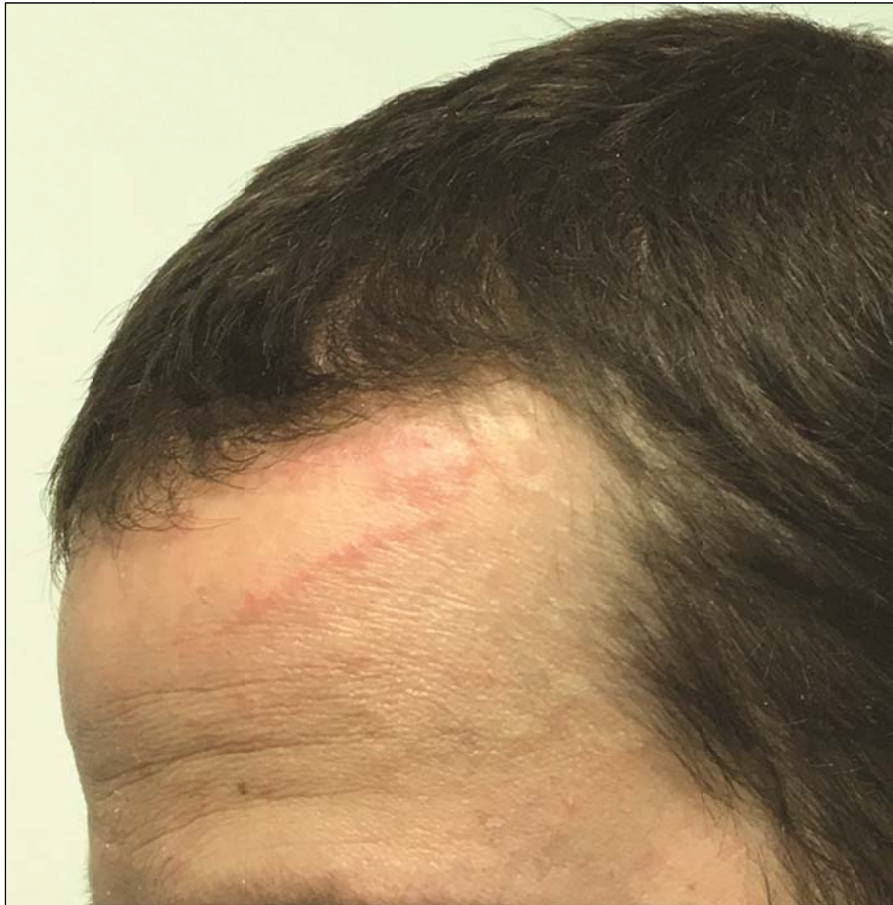

Supplement: 160644-image-1-at.pdf [file 160644-image-1-at.pdf]
